# Supplementary material
Source: PubMed Central journal article supplement (PMC5715780)
Supplement: pnas.201714074SI.pdf [file pnas.201714074SI.pdf]

# Supporting Information

Fedor et al. 10.1073/pnas.1714074114

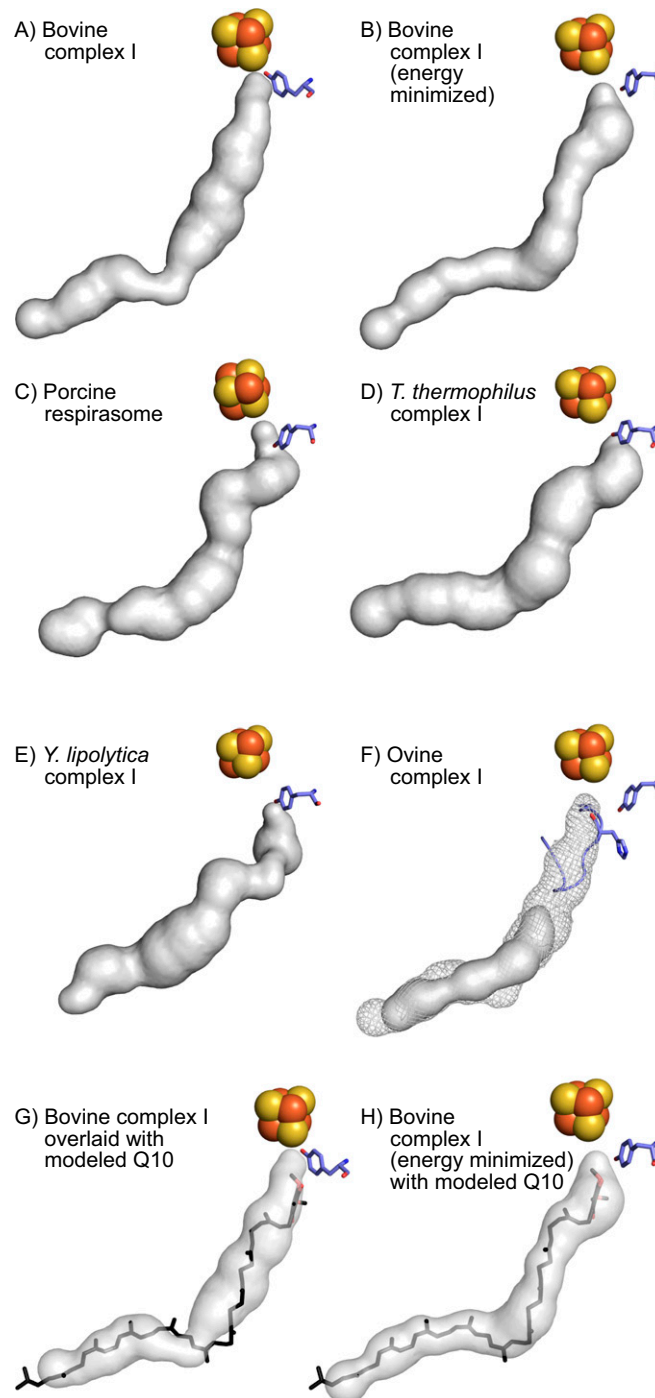

**Fig. S1.** Predicted quinone-binding cavities in published complex I structures. (A) The active state of bovine complex I (PDB ID: 5LC5) (6). (B) The bovine structure with Q10 modeled in using MD simulations (Q10 was removed for the channel prediction). (C) Complex I from the porcine respirasome (PDB ID: 5GUP) (7). (D) *T. thermophilus* complex I (PDB ID: 4HEA) (10). (E) *Y. lipolytica* complex I (PDB ID: 4WZ7) (9). (F) Ovine complex I (PDB ID: 5LNK) (8) in which the cavity is blocked by the  $\beta 1$ - $\beta 2^{49}$  kDa loop; the cavity from A is overlaid as a mesh for comparison. (G) The active state of bovine complex I (PDB ID: 5LC5) with the modeled Q10 structure overlaid. (H) The bovine structure with Q10 modeled in using MD simulations. Cluster N2 is shown as spheres and Y108<sup>49kDa</sup> is shown because its hydroxyl oxygen was used as the starting point for cavity searches. Channels were predicted using the Caver 3.0 plugin in PyMOL (33) with a probe size of 1.4 Å or 1.1 Å for E.
